# Supplementary material for: Genome-Wide Identification, Characterization, and Expression Analysis of the NAC Gene Family in Litchi chinensis
Source: MDPI journal article supplement (doi:10.3390/genes14071416), 2023-07-08
Supplement: s1 [file s1]

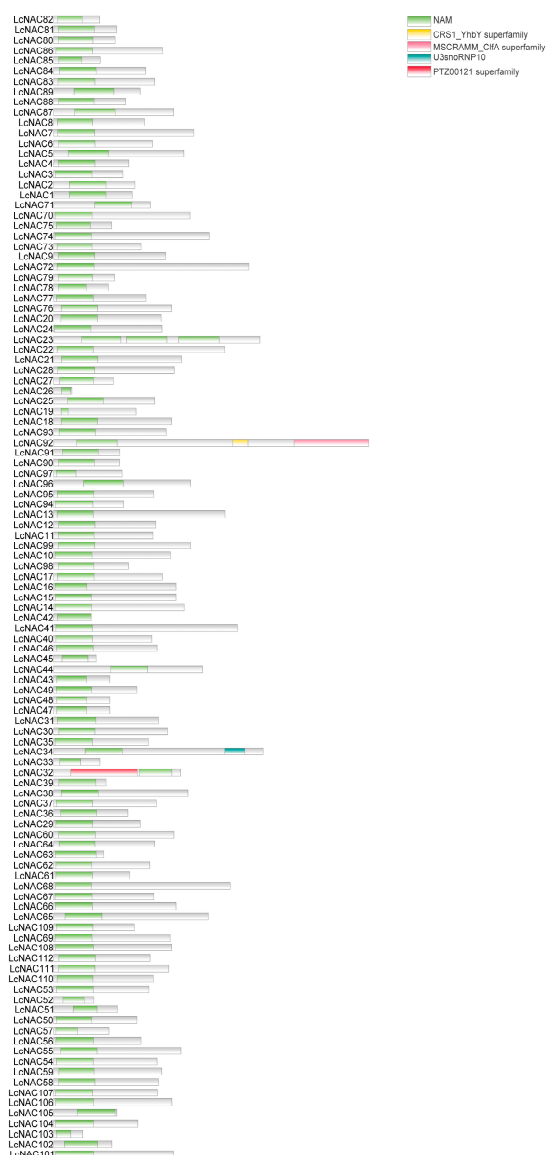

**Figure S1.** Prediction of the NAM structural domain contained in each of the 112 litchi NAC genes.

| Discovered Motifs | Logo | E-value  | Sites | Width |
|-------------------|------|----------|-------|-------|
| 1.                |      | 1.5e-959 | 106   | 16    |
| 2.                |      | 7.4e-898 | 86    | 19    |
| 3.                |      | 8.5e-851 | 102   | 15    |
| 4.                |      | 3.4e-733 | 92    | 21    |
| 5.                |      | 2.5e-655 | 75    | 21    |
| 6.                |      | 1.1e-566 | 91    | 15    |
| 7.                |      | 9.8e-400 | 99    | 11    |
| 8.                |      | 1.0e-182 | 13    | 19    |
| 9.                |      | 3.1e-156 | 84    | 8     |
| 10.               |      | 7.8e-107 | 5     | 50    |

**Figure S2.** Prediction of conserved motifs in litchi NAC protein sequence.
