# Supplementary material for: Genome-Wide Identification, Characterization, and Expression Analysis of the NAC Gene Family in Litchi chinensis
Source: Genes (Basel). 2023 Jul 8;14(7):1416. doi: 10.3390/genes14071416 (PMC10379382; doi:10.3390/genes14071416)
Supplement: Supplementary file 1 [file genes-14-01416-s001.zip › Supplementary Table -S1-S6.xls]

## Sheet: Supplementary Table S1
Table S1 qRT-PCR gene-specific primers
Gene ID	primer sequence(5'-3')
LITCHI020609-F	ACGCAATGTGGCAATCTGAC
LITCHI020609-R	ATCGTGAGTTGCCACTGTTC
LITCHI009913-F	CGCGACAAACAAGCACATTG
LITCHI009913-R	TGTTGTTGACGGTGATGGTG
LITCHI003437-F	AACCGGGTTTGAGCCAATTC
LITCHI003437-R	TTGGTGCCATTGTTGAAGCC
LITCHI002109-F	AAAGACATGCTTGCCAGAGC
LITCHI002109-R	GTCAGGTTTTGAAGCCAAGGAC
LITCHI026019-F	AACCGGTTGGATCATGCATG
LITCHI026019-R	TGCTATTGTCGCCGCTTTTG
LITCHI026762-F	AAGCGCGAACTTGTGGAAAC
LITCHI026762-R	ACCATCCATTTGTGCGACAC
LITCHI019504-F	GCTGCTTCAACAACACTTGC
LITCHI019504-R	GAGTTGGTAGGATTTGGTTGGC
LITCHI018901-F	ATGGCACCAATGGAATCAGC
LITCHI018901-R	TACCGTATGCCACTGTCACAG
LITCHI005204-F	GTATTGGAAGGCCACTGGAAC
LITCHI005204-R	GGAGGCTTGCCCTTGTAAAAC
LITCHI004596-F	AAACCGAGGAACATCAAGCC
LITCHI004596-R	ATTCCACTGGAGCCTGAAGAG

## Sheet: Supplementary Table S2
Table S2 The details of NAC genes in litchi genome
Number	Gene symbol	Gene ID	Gene location	strand	Subcellular Localization analysis	Length(aa)	MW	Theoretical pI	Putative Arabidopsis orthologues	Closest genes	E-value
1	LcNAC1	LITCHI015863	Chr1:20134999..20138562	-	extracellular space	270	31685.7	7.68	AT5G39820.1	ANAC094	3.6e-25
2	LcNAC2	LITCHI015866	Chr1:20205366..20209301	-	extracellular space	279	32506.4	6.31	AT3G15500.1	ANAC056	3.4e-25
3	LcNAC3	LITCHI015867	Chr1:20258001..20261030	-	nucleus	238	27950.1	6.25	AT1G52890.1	ANAC019	7.2e-26
4	LcNAC4	LITCHI015869	Chr1:20357012..20359946	-	nucleus	258	30236.6	5.13	AT5G13180.1	ANAC083	1.7e-26
5	LcNAC5	LITCHI017705	Chr1:48570350..48576146	+	nucleus	447	50329.9	6.39	AT4G29230.1	ANAC075	1.7e-31
6	LcNAC6	LITCHI017793	Chr1:49425181..49428136	+	nucleus	339	37353.1	8.93	AT2G24430.1	ANAC038	1.5e-48
7	LcNAC7	LITCHI015149	Chr1:9252464..9255787	+	nucleus	481	52314.6	5.13	AT2G29420.1	AtGSTU7	4.7e-29
8	LcNAC8	LITCHI012555	Chr2:12101977..12106505	+	nucleus	312	35466	7.59	AT1G56010.2	ANAC021	1.1e-43
9	LcNAC9	LITCHI013065	Chr2:24016531..24019695	+	nucleus	385	41646.5	8.56	AT5G53950.1	ANAC098	2.6e-48
10	LcNAC10	LITCHI013090	Chr2:24416129..24421065	-	nucleus	401	45611.2	5.73	AT1G33060.2	ANAC014	6.1e-38
11	LcNAC11	LITCHI013207	Chr2:26036125..26039053	+	nucleus	341	37939.6	8.51	AT4G27410.3	ANAC72	2.5e-46
12	LcNAC12	LITCHI013210	Chr2:26215291..26218500	+	nucleus	351	38879.8	8.31	AT3G15510.1	ANAC056	6.3e-50
13	LcNAC13	LITCHI012069	Chr2:326704..330722	+	nucleus	588	65658.4	4.94	AT5G24590.2	ANAC091	1.3e-50
14	LcNAC14	LITCHI026762	Chr3:12782568..12785600	+	endomembrane system	448	50207.7	6.39	AT4G01520.1	ANAC067	2.8e-34
15	LcNAC15	LITCHI026763	Chr3:12791100..12793529	+	nucleus	420	47455.9	6.87	AT4G35580.2	CBNAC（NTL9)	4.6e-35
16	LcNAC16	LITCHI026764	Chr3:12800734..12806598	+	nucleus	441	50033.9	6.69	AT4G01550.1	ANAC069	3.6e-36
17	LcNAC17	LITCHI026796	Chr3:13197970..13201566	+	nucleus	373	42341	7.23	AT2G46770.1	ANAC043	1.3e-45
18	LcNAC18	LITCHI027239	Chr3:20071113..20076065	-	nucleus	405	45998.4	6.04	AT3G10490.2	NAC052	2.1e-41
19	LcNAC19	LITCHI027243	Chr3:20167400..20172260	-	nucleus	283	32529.5	6.14	AT3G10490.2	NAC052	\
20	LcNAC20	LITCHI027244	Chr3:20176808..20179495	-	nucleus	369	42653.1	6.22	AT3G10490.2	NAC052	1.9e-45
21	LcNAC21	LITCHI027245	Chr3:20279042..20283121	-	nucleus	439	49693.6	6.01	AT3G10490.2	NAC052	1.1e-46
22	LcNAC22	LITCHI026019	Chr3:5808271..5812681	+	nucleus	587	65406.1	4.94	AT4G28530.1	ANAC074	4.8e-44
23	LcNAC23	LITCHI030575	Chr4:9028811..9042016	-	nucleus	708	80890.2	9.14	AT3G04070.1	ANAC047	5e-37
24	LcNAC24	LITCHI001130	Chr5:23323680..23328555	-	nucleus	372	42940	8.38	AT2G02450.2	ANAC034	5.7e-44
25	LcNAC25	LITCHI001182	Chr5:24088732..24090773	+	nucleus	347	40519.9	6.83	AT1G77450.1	ANAC032	7.3e-40
26	LcNAC26	LITCHI001183	Chr5:24091923..24092543	+	nucleus	63	7145.02	9.1	AT3G04070.1	ANAC047	\
27	LcNAC27	LITCHI001198	Chr5:24243229..24244745	-	nucleus	205	23218.6	4.71	AT5G64530.1	ANAC104	6.6e-31
28	LcNAC28	LITCHI001469	Chr5:27624049..27625291	-	nucleus	414	45173.7	4.69	AT3G18400.1	ANAC058	1.1e-26
29	LcNAC29	LITCHI002109	Chr5:33430872..33432692	+	nucleus	297	34338.4	8.31	AT2G17040.1	ANAC036	8.4e-44
30	LcNAC30	LITCHI003432	Chr6:23011658..23013336	-	nucleus	391	44332	6.22	AT5G18270.1	ANAC087	3.5e-30
31	LcNAC31	LITCHI003437	Chr6:23033275..23036494	-	nucleus	366	41068.2	7.23	AT3G04070.1	ANAC047	2.1e-47
32	LcNAC32	LITCHI003936	Chr6:28667665..28671766	-	nucleus	436	50869.3	6.38	AT1G69490.1	ANAC029	2.7e-15
33	LcNAC33	LITCHI002570	Chr6:8341922..8343072	-	nucleus	159	17952.2	9.63	AT3G44350.2	ANAC061	5e-17
34	LcNAC34	LITCHI008814	Chr7:17649006..17653663	-	organelle membrane	719	81384.9	6.86	AT3G06530.2	ARM repeat superfamily protein	2.2e-20
35	LcNAC35	LITCHI008829	Chr7:18052349..18053326	+	nucleus	325	36862	4.83	AT5G62380.1	ANAC101	4.9e-21
36	LcNAC36	LITCHI008852	Chr7:18520166..18521879	-	nucleus	255	29076.2	9.05	AT3G04070.1	ANAC047	9.8e-38
37	LcNAC37	LITCHI009113	Chr7:22547507..22553663	-	nucleus	353	40939.8	5.84	AT1G12260.1	ANAC007	5.3e-48
38	LcNAC38	LITCHI009640	Chr7:29142700..29146042	-	nucleus	461	52601.9	9.19	AT2G43000.1	ANAC042	2.2e-43
39	LcNAC39	LITCHI009749	Chr7:30319388..30322920	-	nucleus	180	21133.7	8.75	AT2G33480.1	NAC041	1.8e-25
40	LcNAC40	LITCHI009778	Chr7:30571064..30575027	-	nucleus	337	38482.7	5.09	AT1G54330.1	ANAC020	1e-51
41	LcNAC41	LITCHI008062	Chr7:423812..428255	+	nucleus	631	72200.7	5.44	AT1G65910.1	ANAC028	6.6e-51
42	LcNAC42	LITCHI008075	Chr7:622824..623231	+	nucleus	129	14797.5	5.14	AT5G62380.1	ANAC101	1.6e-13
43	LcNAC43	LITCHI008508	Chr7:7049892..7053371	-	nucleus	193	22571	5.75	AT1G62700.1	ANAC026	7.3e-13
44	LcNAC44	LITCHI009641	Chr7:29169729..29176179	-	nucleus	511	58531.3	8.44	AT3G12910.1	ANAC042	5e-77
45	LcNAC45	LITCHI009642	Chr7:29176184..29177633	-	nucleus	146	17453.7	8.96	AT3G15170.1	ANAC054	1e-27
46	LcNAC46	LITCHI011953	Chr8:29377001..29381003	-	nucleus	355	40666.2	6.79	AT4G10350.1	ANAC070	E-139
47	LcNAC47	LITCHI009823	Chr8:104320..107461	-	nucleus	317	36179.6	6.76	AT1G79580.1	ANAC033	2.6e-47
48	LcNAC48	LITCHI010949	Chr8:10609951..10613812	+	nucleus	291	32912	5.94	AT1G65910.1	ANAC028	7.3e-28
49	LcNAC49	LITCHI011271	Chr8:15751753..15754903	-	nucleus	286	32792.2	7.04	AT1G01720.1	ANAC2	2.3e-48
50	LcNAC50	LITCHI011550	Chr8:23349186..23352099	+	nucleus	601	67895.4	4.74	AT1G34190.1	ANAC017	1.9e-46
51	LcNAC51	LITCHI011590	Chr8:24174047..24175016	-	chloroplast	219	25446.8	9.29	AT1G77450.1	ANAC032	3.3e-19
52	LcNAC52	LITCHI011606	Chr8:24453356..24455363	+	chloroplast	138	15858.5	5.4	AT3G03200.1	ANAC045	1e-10
53	LcNAC53	LITCHI011636	Chr8:24756889..24761918	+	nucleus	327	38039.5	6.2	AT1G71930.1	ANAC030	7.9e-47
54	LcNAC54	LITCHI011999	Chr8:29808723..29812722	+	nucleus	355	40694.3	6.99	AT4G10350.1	ANAC070	3.7e-47
55	LcNAC55	LITCHI009913	Chr8:742629..746641	+	nucleus	437	48697.5	5.85	AT1G76420.1	ANAC031	6.4e-46
56	LcNAC56	LITCHI029125	Chr9:21548100..21550810	+	nucleus	316	35689.1	6.37	AT1G61110.1	ANAC025	1e-46
57	LcNAC57	LITCHI029127	Chr9:21568166..21568738	-	nucleus	190	21813.5	9.5	AT1G28470.1	ANAC010	1.4e-14
58	LcNAC58	LITCHI029254	Chr9:23344061..23346113	+	nucleus	370	41063.5	8.74	AT1G61110.1	ANAC025	6.9e-50
59	LcNAC59	LITCHI022831	Chr10:10015208..10021642	-	nucleus	371	42856.8	7.22	AT1G12260.1	ANAC007	1.9e-49
60	LcNAC60	LITCHI021813	Chr10:1169624..1171974	-	nucleus	413	47275.8	6.1	AT2G46770.1	ANAC043	2.5e-45
61	LcNAC61	LITCHI022992	Chr10:12060261..12064439	-	nucleus	261	30163.3	5.25	AT3G17730.1	ANAC057	1.7e-49
62	LcNAC62	LITCHI023185	Chr10:14861333..14864925	+	nucleus	330	37193.7	8.28	AT3G18400.1	ANAC058	4.1e-49
63	LcNAC63	LITCHI023389	Chr10:17933493..17935211	-	extracellular space	172	19576.5	5.67	AT1G69490.1	ANAC029	5.5e-19
64	LcNAC64	LITCHI023466	Chr10:20234647..20236748	+	nucleus	347	38802.1	9.19	AT5G61430.1	ANAC100	5.4e-49
65	LcNAC65	LITCHI022256	Chr10:4739055..4741528	+	nucleus	531	59606.6	5.9	AT5G61430.1	ANAC100	2.4e-29
66	LcNAC66	LITCHI022258	Chr10:4742500..4745318	+	nucleus	423	47817.6	5.87	AT5G61430.1	ANAC100	6.8e-37
67	LcNAC67	LITCHI022261	Chr10:4755595..4757981	+	nucleus	344	39647.9	5.47	AT4G17980.1	ANAC071	2.8e-38
68	LcNAC68	LITCHI022262	Chr10:4761642..4765688	+	nucleus	606	67830.2	5.38	AT5G61430.1	ANAC100	1.1e-25
69	LcNAC69	LITCHI022266	Chr10:4772287..4774242	+	nucleus	400	45675.2	5.43	AT4G35580.2	CBNAC（NTL9)	1.4e-38
70	LcNAC70	LITCHI022268	Chr10:4785274..4796115	+	nucleus	468	52392.2	5.57	AT5G39820.1	ANAC094	6e-24
71	LcNAC71	LITCHI022305	Chr10:5027065..5028853	-	nucleus	332	38217.4	9.22	AT5G61430.1	ANAC100	2.5e-36
72	LcNAC72	LITCHI021766	Chr10:771247..774969	+	nucleus	670	75226.1	4.85	AT1G33060.2	ANAC014	1.6e-47
73	LcNAC73	LITCHI007385	Chr11:12753714..12757625	-	nucleus	300	34228.9	7.01	AT1G01720.1	ANAC2	3e-46
74	LcNAC74	LITCHI007462	Chr11:14771708..14781277	-	nucleus	534	59258.1	4.67	AT5G09330.1	ANAC082	2.9e-44
75	LcNAC75	LITCHI007494	Chr11:15804598..15805591	-	nucleus	199	22832.7	4.55	AT5G64530.1	ANAC104	6.5e-27
76	LcNAC76	LITCHI006492	Chr11:1718709..1720355	+	nucleus	258	28335.1	8.72	AT5G14000.1	ANAC084	2.4e-28
77	LcNAC77	LITCHI006498	Chr11:1759322..1764331	-	nucleus	317	36743	5.36	AT4G36160.1	ANAC076	4.9e-50
78	LcNAC78	LITCHI007857	Chr11:23630279..23630935	-	nucleus	188	21985.7	8.93	AT2G33480.1	NAC041	9.4e-10
79	LcNAC79	LITCHI007863	Chr11:23739413..23740068	-	nucleus	209	24666.8	9.43	AT2G33480.1	NAC041	1.5e-17
80	LcNAC80	LITCHI007865	Chr11:23763947..23764601	-	nucleus	211	24729.9	9.44	AT2G33480.1	NAC041	1.9e-18
81	LcNAC81	LITCHI007870	Chr11:23819764..23820419	-	nucleus	216	25451.8	9.3	AT3G04070.1	ANAC047	7.6e-22
82	LcNAC82	LITCHI007892	Chr11:24230159..24232162	+	nucleus	158	18245.6	9.21	AT3G18400.1	ANAC058	9.6e-12
83	LcNAC83	LITCHI007894	Chr11:24235785..24236962	+	nucleus	347	39021.1	4.82	AT3G04070.1	ANAC047	4.8e-21
84	LcNAC84	LITCHI020164	Chr12:10045564..10049488	-	nucleus	316	36553.2	8.37	AT2G43000.1	ANAC042	1.2e-45
85	LcNAC85	LITCHI020284	Chr12:11849160..11850483	-	extracellular space	160	18562	7.56	AT5G13180.1	ANAC083	1.5e-44
86	LcNAC86	LITCHI020398	Chr12:13242854..13245129	+	nucleus	374	42079.9	5.01	AT4G17980.1	ANAC071	2.2e-49
87	LcNAC87	LITCHI020609	Chr12:15877900..15889545	+	nucleus	412	45903	5.56	AT3G27550.1	CFM9	1.9e-28
88	LcNAC88	LITCHI020796	Chr12:17339205..17340945	+	nucleus	247	28143	9.14	AT5G14000.1	ANAC084	8.4e-32
89	LcNAC89	LITCHI020988	Chr12:18906431..18909795	-	nucleus	297	33217.2	8.75	AT4G28500.1	ANAC073	1.5e-31
90	LcNAC90	LITCHI021007	Chr12:19044076..19045377	-	nucleus	226	26069.6	9.61	AT2G33480.1	NAC041	1.3e-22
91	LcNAC91	LITCHI019963	Chr12:7426808..7429073	+	nucleus	227	26505.5	9.48	AT5G07680.1	ANAC080	1.7e-32
92	LcNAC92	LITCHI020612	Chr12:15906421..15918071	+	nucleus	1081	123608	6.09	AT1G25580.1	ANAC008	1e-81
93	LcNAC93	LITCHI024392	Chr13:15301746..15305705	-	endomembrane system	386	43469	8.51	AT2G27300.1	ANAC040	1.5e-44
94	LcNAC94	LITCHI024427	Chr13:15685184..15689969	-	nucleus	244	27915.1	6.11	AT5G22380.1	ANAC090	2.2e-36
95	LcNAC95	LITCHI024726	Chr13:19399931..19403011	+	nucleus	344	39215.4	6.62	AT1G61110.1	ANAC025	1.4e-46
96	LcNAC96	LITCHI005476	Chr14:10329271..10335319	+	nucleus	470	53160.4	5.03	AT1G25580.1	ANAC008	4.4e-30
97	LcNAC97	LITCHI006182	Chr14:21317320..21318038	+	nucleus	235	27631.6	8.74	No_Hit		6e-11
98	LcNAC98	LITCHI004596	Chr14:2476585..2479297	-	nucleus	257	29355.1	9.14	AT5G13180.1	ANAC083	1.3e-47
99	LcNAC99	LITCHI005168	Chr14:7308714..7310711	+	nucleus	469	52506.9	7.16	AT1G26870.1	ANAC009	1.5e-46
100	LcNAC100	LITCHI005204	Chr14:7662507..7663627	-	nucleus	285	33353.8	8.24	AT1G69490.1	ANAC029	6.7e-52
101	LcNAC101	LITCHI005253	Chr14:8107206..8108794	+	nucleus	411	46355.9	4.56	AT1G77450.1	ANAC032	1.6e-22
102	LcNAC102	LITCHI005286	Chr14:8329033..8329989	-	nucleus	200	22768.4	4.56	AT1G69490.1	ANAC029	4.4e-26
103	LcNAC103	LITCHI005287	Chr14:8332063..8332737	-	chloroplast	100	11255.7	6.41	AT5G07680.1	ANAC080	7.2e-10
104	LcNAC104	LITCHI018901	Chr15:10345819..10348138	+	nucleus	289	33286.5	5.93	AT5G22380.1	ANAC090	1.4e-35
105	LcNAC105	LITCHI019424	Chr15:17617923..17619083	-	organelle membrane	217	24589.4	6.13	AT3G10490.2	NAC052	1.2e-23
106	LcNAC106	LITCHI019446	Chr15:18015812..18017032	-	nucleus	406	45773.1	4.71	AT1G01720.1	ANAC2	3.5e-22
107	LcNAC107	LITCHI019453	Chr15:18077407..18078726	+	nucleus	356	40047.7	4.86	AT5G62380.1	ANAC101	4.9e-22
108	LcNAC108	LITCHI019457	Chr15:18136605..18138218	+	nucleus	405	45238.4	4.58	AT5G62380.1	ANAC101	5.2e-23
109	LcNAC109	LITCHI019482	Chr15:18491275..18492108	-	nucleus	277	31578.8	6.08	AT5G62380.1	ANAC101	7.5e-22
110	LcNAC110	LITCHI019504	Chr15:19003505..19005584	-	nucleus	342	38922.8	6.46	AT5G61430.1	ANAC100	1.7e-50
111	LcNAC111	LITCHI019546	Chr15:20027932..20030131	-	nucleus	395	44372	6.46	AT1G26870.1	ANAC009	6.2e-47
112	LcNAC112	LITCHI018572	Chr15:6962030..6964360	-	nucleus	331	38050.9	8.76	AT1G61110.1	ANAC025	8e-50

## Sheet: Supplementary Table S3
Table S3 Statistics of the four major cis-acting elements of the litchi NAC gene promoter
Number	hormone-responsive	light-responsive	plant growth and development-related	stress-related
1	LcNAC101	LcNAC1	LcNAC101	LcNAC1
2	LcNAC10	LcNAC10	LcNAC102	LcNAC10
3	LcNAC103	LcNAC100	LcNAC105	LcNAC101
4	LcNAC104	LcNAC105	LcNAC108	LcNAC102
5	LcNAC109	LcNAC11	LcNAC3	LcNAC105
6	LcNAC11	LcNAC110	LcNAC32	LcNAC111
7	LcNAC111	LcNAC111	LcNAC38	LcNAC112
8	LcNAC16	LcNAC112	LcNAC41	LcNAC12
9	LcNAC17	LcNAC14	LcNAC45	LcNAC15
10	LcNAC25	LcNAC17	LcNAC53	LcNAC2
11	LcNAC29	LcNAC18	LcNAC77	LcNAC22
12	LcNAC38	LcNAC19	LcNAC8	LcNAC23
13	LcNAC39	LcNAC20	LcNAC94	LcNAC28
14	LcNAC43	LcNAC21	LcNAC98	LcNAC3
15	LcNAC48	LcNAC22	LcNAC1	LcNAC31
16	LcNAC49	LcNAC23	LcNAC109	LcNAC35
17	LcNAC50	LcNAC24	LcNAC110	LcNAC36
18	LcNAC60	LcNAC25	LcNAC111	LcNAC40
19	LcNAC70	LcNAC3	LcNAC16	LcNAC41
20	LcNAC8	LcNAC31	LcNAC17	LcNAC47
21	LcNAC86	LcNAC32	LcNAC19	LcNAC52
22	LcNAC87	LcNAC33	LcNAC28	LcNAC53
23	LcNAC88	LcNAC34	LcNAC29	LcNAC66
24	LcNAC92	LcNAC35	LcNAC31	LcNAC7
25	LcNAC93	LcNAC38	LcNAC34	LcNAC75
26	LcNAC96	LcNAC39	LcNAC4	LcNAC77
27	LcNAC98	LcNAC40	LcNAC44	LcNAC8
28	LcNAC99	LcNAC41	LcNAC48	LcNAC84
29	LcNAC110	LcNAC42	LcNAC5	LcNAC89
30	LcNAC28	LcNAC44	LcNAC50	LcNAC9
31	LcNAC33	LcNAC45	LcNAC52	LcNAC90
32	LcNAC34	LcNAC46	LcNAC55	LcNAC92
33	LcNAC5	LcNAC48	LcNAC58	LcNAC95
34	LcNAC55	LcNAC49	LcNAC59	LcNAC99
35	LcNAC6	LcNAC54	LcNAC60	LcNAC100
36	LcNAC66	LcNAC55	LcNAC7	LcNAC103
37	LcNAC91	LcNAC57	LcNAC74	LcNAC106
38	LcNAC1	LcNAC58	LcNAC76	LcNAC107
39	LcNAC12	LcNAC6	LcNAC83	LcNAC108
40	LcNAC35	LcNAC62	LcNAC84	LcNAC109
41	LcNAC107	LcNAC63	LcNAC9	LcNAC11
42	LcNAC18	LcNAC65	LcNAC91	LcNAC110
43	LcNAC22	LcNAC66	LcNAC92	LcNAC13
44	LcNAC23	LcNAC69	LcNAC93	LcNAC14
45	LcNAC30	LcNAC7	LcNAC99	LcNAC16
46	LcNAC37	LcNAC70	LcNAC100	LcNAC18
47	LcNAC42	LcNAC73	LcNAC103	LcNAC19
48	LcNAC46	LcNAC76	LcNAC107	LcNAC20
49	LcNAC47	LcNAC77	LcNAC11	LcNAC21
50	LcNAC53	LcNAC78	LcNAC112	LcNAC24
51	LcNAC54	LcNAC79	LcNAC13	LcNAC25
52	LcNAC58	LcNAC8	LcNAC18	LcNAC26
53	LcNAC59	LcNAC80	LcNAC20	LcNAC27
54	LcNAC69	LcNAC81	LcNAC23	LcNAC29
55	LcNAC7	LcNAC82	LcNAC25	LcNAC30
56	LcNAC71	LcNAC83	LcNAC26	LcNAC32
57	LcNAC73	LcNAC84	LcNAC27	LcNAC33
58	LcNAC77	LcNAC86	LcNAC36	LcNAC34
59	LcNAC78	LcNAC90	LcNAC39	LcNAC37
60	LcNAC79	LcNAC92	LcNAC49	LcNAC38
61	LcNAC80	LcNAC96	LcNAC56	LcNAC39
62	LcNAC81	LcNAC98	LcNAC6	LcNAC4
63	LcNAC82	LcNAC99	LcNAC62	LcNAC42
64	LcNAC83	LcNAC101	LcNAC66	LcNAC43
65	LcNAC84	LcNAC108	LcNAC68	LcNAC44
66	LcNAC85	LcNAC109	LcNAC73	LcNAC45
67	LcNAC90	LcNAC16	LcNAC78	LcNAC48
68	LcNAC97	LcNAC28	LcNAC80	LcNAC5
69	LcNAC100	LcNAC29	LcNAC81	LcNAC55
70	LcNAC102	LcNAC4	LcNAC88	LcNAC56
71	LcNAC13	LcNAC5	LcNAC89	LcNAC57
72	LcNAC20	LcNAC50	LcNAC97	LcNAC6
73	LcNAC41	LcNAC52	LcNAC104	LcNAC60
74	LcNAC44	LcNAC53	LcNAC2	LcNAC61
75	LcNAC57	LcNAC59	LcNAC33	LcNAC62
76	LcNAC75	LcNAC60	LcNAC67	LcNAC65
77	LcNAC2	LcNAC74	LcNAC70	LcNAC67
78	LcNAC21	LcNAC9	LcNAC71	LcNAC68
79	LcNAC26	LcNAC91	LcNAC79	LcNAC69
80	LcNAC31	LcNAC93	LcNAC106	LcNAC73
81	LcNAC4	LcNAC102	LcNAC35	LcNAC74
82	LcNAC51	LcNAC103	LcNAC40	LcNAC76
83	LcNAC62	LcNAC104	LcNAC42	LcNAC78
84	LcNAC106	LcNAC106	LcNAC10	LcNAC79
85	LcNAC112	LcNAC12	LcNAC14	LcNAC80
86	LcNAC15	LcNAC13	LcNAC21	LcNAC81
87	LcNAC19	LcNAC2	LcNAC22	LcNAC82
88	LcNAC24	LcNAC26	LcNAC24	LcNAC83
89	LcNAC36	LcNAC27	LcNAC46	LcNAC85
90	LcNAC40	LcNAC30	LcNAC54	LcNAC86
91	LcNAC52	LcNAC36	LcNAC57	LcNAC87
92	LcNAC56	LcNAC61	LcNAC63	LcNAC88
93	LcNAC67	LcNAC68	LcNAC65	LcNAC91
94	LcNAC68	LcNAC95	LcNAC69	LcNAC93
95	LcNAC76	LcNAC97	LcNAC82	LcNAC94
96	LcNAC9	LcNAC15	LcNAC86	LcNAC96
97	LcNAC89	LcNAC37	LcNAC90	LcNAC98
98	LcNAC108	LcNAC43	LcNAC96	LcNAC17
99	LcNAC14	LcNAC47	LcNAC12	LcNAC49
100	LcNAC27	LcNAC51	LcNAC61	LcNAC50
101	LcNAC3	LcNAC56	LcNAC85	LcNAC51
102	LcNAC32	LcNAC67	LcNAC87	LcNAC58
103	LcNAC45	LcNAC75	LcNAC95	LcNAC97
104	LcNAC61	LcNAC87	\	LcNAC104
105	LcNAC74	LcNAC94	\	LcNAC46
106	LcNAC94	LcNAC88	\	LcNAC54
107	LcNAC95	LcNAC85	\	LcNAC59
108	LcNAC105	LcNAC107	\	LcNAC70
109	LcNAC65	LcNAC89	\	\
110	\	LcNAC71	\	\

## Sheet: Supplementary Table S4
Table S4 Statistics on the grouping of promoter elements of the litchi NAC gene
Hormone-responsive	Number	Light-responsive	Number	Plant growth and development-related	Number	Stress-related	Number
ABRE	393	Box 4	368	TCT-motif	87	ARE	228
ERE	164	G-Box	318	I-box	47	WUN-motif	82
TGACG-motif	143	GT1-motif	156	TCCC-motif	39	MBS	79
CGTCA-motif	141	TCT-motif	86	chs-CMA	24	LTR	58
CGTCA-motif	141	GATA-motif	73	ATCT-motif	20	O2-site	57
TCA-element	134	TCA	67	ACE	19	TC-rich repeats	39
P-box	54	MRE	57	A-box	17	GCN4_motif	24
GARE-motif	22	AE-box	56	Sp1	13	RY-element	20
TATC-box	21	I-box	47			GC-motif	13
AuxRR-core	12	TCCC-motif	39			MSA-like	11
TGA-box	4	chs-CMA1a	24			HD-Zip 1	10
		ATCT-motif	20			MBSI	8
		ACE	19			NON	2
		GA-motif	19
		Gap-box	18
		AT1-motif	15
		chs-CMA2a	13
		ATC-motif	13
		Sp1	13
		LAMP-element	13
		3-AF1 binding site	12
		Box II	10
		LS7	5
		CAG-motif	4
		GTGGC-motif	3
		DRE	2
		P-box	1
		L-box	1
		AAAC-motif	1

## Sheet: Supplementary Table S5
	Table S5 NAC genes of litchi containing hormone-responsive elements
Number	auxin	gibberellin	salicylic acid	abscisic acid	MeJA
1	LcNAC101	LcNAC101	LcNAC101	LcNAC101	LcNAC101
2	LcNAC10	LcNAC1	LcNAC1	LcNAC18	LcNAC1
3	LcNAC103	LcNAC107	LcNAC10	LcNAC23	LcNAC10
4	LcNAC104	LcNAC111	LcNAC106	LcNAC52	LcNAC100
5	LcNAC109	LcNAC12	LcNAC107	LcNAC99	LcNAC103
6	LcNAC11	LcNAC17	LcNAC109	LcNAC1	LcNAC105
7	LcNAC111	LcNAC18	LcNAC11	LcNAC10	LcNAC106
8	LcNAC16	LcNAC22	LcNAC110	LcNAC100	LcNAC107
9	LcNAC17	LcNAC23	LcNAC112	LcNAC102	LcNAC108
10	LcNAC25	LcNAC25	LcNAC15	LcNAC104	LcNAC109
11	LcNAC29	LcNAC30	LcNAC16	LcNAC106	LcNAC11
12	LcNAC38	LcNAC35	LcNAC17	LcNAC108	LcNAC111
13	LcNAC39	LcNAC37	LcNAC19	LcNAC109	LcNAC112
14	LcNAC43	LcNAC42	LcNAC20	LcNAC11	LcNAC12
15	LcNAC48	LcNAC46	LcNAC22	LcNAC111	LcNAC13
16	LcNAC49	LcNAC47	LcNAC24	LcNAC112	LcNAC14
17	LcNAC50	LcNAC5	LcNAC28	LcNAC12	LcNAC15
18	LcNAC60	LcNAC53	LcNAC30	LcNAC13	LcNAC16
19	LcNAC70	LcNAC54	LcNAC33	LcNAC14	LcNAC19
20	LcNAC8	LcNAC58	LcNAC36	LcNAC15	LcNAC23
21	LcNAC86	LcNAC59	LcNAC38	LcNAC16	LcNAC26
22	LcNAC87	LcNAC6	LcNAC40	LcNAC19	LcNAC27
23	LcNAC88	LcNAC69	LcNAC41	LcNAC20	LcNAC3
24	LcNAC92	LcNAC7	LcNAC49	LcNAC21	LcNAC35
25	LcNAC93	LcNAC71	LcNAC50	LcNAC22	LcNAC36
26	LcNAC96	LcNAC73	LcNAC51	LcNAC24	LcNAC37
27	LcNAC98	LcNAC77	LcNAC52	LcNAC26	LcNAC39
28	LcNAC99	LcNAC78	LcNAC53	LcNAC27	LcNAC4
29	LcNAC110	LcNAC79	LcNAC56	LcNAC28	LcNAC40
30	LcNAC28	LcNAC80	LcNAC62	LcNAC29	LcNAC42
31	LcNAC33	LcNAC81	LcNAC67	LcNAC3	LcNAC43
32	LcNAC34	LcNAC82	LcNAC68	LcNAC31	LcNAC45
33	LcNAC5	LcNAC83	LcNAC69	LcNAC32	LcNAC46
34	LcNAC55	LcNAC84	LcNAC70	LcNAC33	LcNAC48
35	LcNAC6	LcNAC85	LcNAC76	LcNAC35	LcNAC49
36	LcNAC66	LcNAC90	LcNAC78	LcNAC37	LcNAC51
37	LcNAC91	LcNAC91	LcNAC8	LcNAC38	LcNAC52
38	LcNAC1	LcNAC92	LcNAC82	LcNAC39	LcNAC54
39	LcNAC12	LcNAC93	LcNAC85	LcNAC4	LcNAC56
40	LcNAC35	LcNAC97	LcNAC88	LcNAC41	LcNAC58
41	\	LcNAC98	LcNAC9	LcNAC42	LcNAC59
42	\	LcNAC99	LcNAC92	LcNAC44	LcNAC60
43	\	LcNAC100	LcNAC93	LcNAC45	LcNAC61
44	\	LcNAC102	LcNAC96	LcNAC46	LcNAC62
45	\	LcNAC13	LcNAC99	LcNAC48	LcNAC66
46	\	LcNAC20	LcNAC47	LcNAC49	LcNAC67
47	\	LcNAC33	LcNAC73	LcNAC5	LcNAC68
48	\	LcNAC34	LcNAC86	LcNAC51	LcNAC69
49	\	LcNAC41	LcNAC89	LcNAC53	LcNAC70
50	\	LcNAC43	\	LcNAC54	LcNAC73
51	\	LcNAC44	\	LcNAC55	LcNAC74
52	\	LcNAC57	\	LcNAC56	LcNAC76
53	\	LcNAC75	\	LcNAC57	LcNAC77
54	\	LcNAC109	\	LcNAC58	LcNAC78
55	\	LcNAC2	\	LcNAC59	LcNAC79
56	\	LcNAC21	\	LcNAC6	LcNAC8
57	\	LcNAC26	\	LcNAC60	LcNAC80
58	\	LcNAC31	\	LcNAC61	LcNAC81
59	\	LcNAC4	\	LcNAC62	LcNAC82
60	\	LcNAC51	\	LcNAC66	LcNAC83
61	\	LcNAC55	\	LcNAC67	LcNAC84
62	\	LcNAC62	\	LcNAC68	LcNAC86
63	\	\	\	LcNAC7	LcNAC87
64	\	\	\	LcNAC71	LcNAC88
65	\	\	\	LcNAC73	LcNAC90
66	\	\	\	LcNAC74	LcNAC92
67	\	\	\	LcNAC76	LcNAC93
68	\	\	\	LcNAC78	LcNAC94
69	\	\	\	LcNAC8	LcNAC95
70	\	\	\	LcNAC80	LcNAC96
71	\	\	\	LcNAC81	LcNAC97
72	\	\	\	LcNAC82	LcNAC98
73	\	\	\	LcNAC83	LcNAC65
74	\	\	\	LcNAC86	\
75	\	\	\	LcNAC88	\
76	\	\	\	LcNAC89	\
77	\	\	\	LcNAC9	\
78	\	\	\	LcNAC91	\
79	\	\	\	LcNAC92	\
80	\	\	\	LcNAC93	\
81	\	\	\	LcNAC94	\
82	\	\	\	LcNAC95	\
83	\	\	\	LcNAC96	\
84	\	\	\	LcNAC97	\
85	\	\	\	LcNAC98	\
86	\	\	\	LcNAC34	\
87	\	\	\	LcNAC50	\

## Sheet: Supplementary Table S6
Table S6 Statistics on the number of hormone-like promoter response elements
Hormone	Number
auxin-responsive element	60
gibberellin-responsive element	98
salicylic acid responsiveness element	67
abscisic acid responsiveness element	292
MeJA-responsiveness element	284
